# Supplementary material for: CPSARST: an efficient circular permutation search tool applied to the detection of novel protein structural relationships
Source: Springer Nature journal article supplement (doi:10.1186/gb-2008-9-1-r11), 2008-01-18
Supplement: Additional file 8 [file gb-2008-9-1-r11-s8.pdf]

**Default settings:**

| Function                          | Setting                   | Note                                      |
|-----------------------------------|---------------------------|-------------------------------------------|
| Searching mode                    | one-against-all           | Alternative: all-against-one <sup>a</sup> |
| Word size                         | 2                         |                                           |
| Gap penalties                     | G=10, E=3                 | G: gap-opening;<br>E: gap-extension       |
| Sequence identity improvement     | disabled                  |                                           |
| Permutation size ( $S_p$ ) limit  | $10\% \leq S_p \leq 50\%$ |                                           |
| Structural similarity improvement | > 25%                     |                                           |
| CP score threshold                | 0.15                      |                                           |
| RMSD cutoff                       | 5.0 Å                     |                                           |

<sup>a</sup> All-against-one search is more time-consuming (around 10-fold) but sometimes more sensitive. In a practical database search, “A can be used to find B (A→B)” does not necessarily mean “B can also be used to find A (A←B)” under the same parameter settings. With this “all-against-one” searching mode, where the query and target proteins interchange their roles, “A↔B” can be achieved by using the same parameter settings.

**Settings for Figure 3:**

Query protein: PDB ID 2B4L, chain A

→Using default settings expect the gap penalties: G=9, E=2

**Settings for Figure 4:**

Query protein: PDB ID 1ZBD, chain A

→Using default settings

Query protein: PDB ID 1PUJ, chain A

→Using default settings except the searching mode: all-against-one

**Settings for Figure 5:**

Query protein: PDB ID 1YAD, chain A

→Using default settings except the  $S_p$  limit:  $5\% \leq S_p \leq 50\%$

Query protein: PDB ID 2DUA, chain A

→Using default settings except the searching mode: all-against-one

**Settings for Table 1:**

| Query structure |       | Retrieved structure |       | Settings                                                                   |
|-----------------|-------|---------------------|-------|----------------------------------------------------------------------------|
| PDB entry       | Chain | PDB entry           | Chain |                                                                            |
| 1AJK            | A,B   | 2AYH                |       | Defaults                                                                   |
| 1AJO            | A,B   | 2AYH                |       | Defaults                                                                   |
| 1ALQ            |       | 3BLM                |       | Defaults &<br>Structural similarity improvement > 20%                      |
| 1BD7            | A,B   | 1BLB                | C     | Defaults &<br>Structural similarity improvement > 10%<br>RMSD cutoff: 16 Å |
| 1CPM            |       | 2AYH                |       | Defaults                                                                   |
| 1CPN            |       | 2AYH                |       | Defaults                                                                   |
| 1FW8            | A     | 3PGK                |       | Defaults                                                                   |
| 1G2B            | A     | 1SHG                |       | Defaults                                                                   |
| 1N02            | A     | 2EZM                |       | Defaults                                                                   |
| 1P5C            | A–D   | 1LW9                | A     | Defaults &<br>Structural similarity improvement > 15%                      |
| 1SWF            | A–D   | 1STP                |       | Defaults                                                                   |
| 1SWG            | A–D   | 1STP                |       | Defaults                                                                   |
| 1TUC            |       | 1SHG                |       | Defaults                                                                   |
| 1TUD            |       | 1SHG                |       | Defaults                                                                   |
| 1UN2            | A     | 1A2J                |       | Defaults                                                                   |

**Settings for Tables 2–4:**

➔Using default settings except the  $S_p$  limit:  $20\% \leq S_p \leq 50\%$ , and CP score threshold: 0.2.

**Settings for Table 5:**

Query protein: PDB ID 1PUJ, chain A

➔Using default settings except the searching mode: all-against-one
