# Supplementary material for: CPSARST: an efficient circular permutation search tool applied to the detection of novel protein structural relationships
Source: PubMed Central journal article supplement (PMC2395249; doi:10.1186/gb-2008-9-1-r11), 2008-01-18
Supplement: gb-2008-9-1-r11-S5.pdf [file gb-2008-9-1-r11-S5.pdf]

## CPSARST – An efficient circular permutation search tool applied to the detection of novel protein structural relationships

Wei-Cheng Lo and Ping-Chiang Lyu

### Additional data file 5 – Statistics of protein structural database searches with broad criteria

Description: The criteria of these database searches are  $\text{RMSD} \leq 6 \text{ \AA}$ ,  $\text{CP score} \leq 0.1$ , and permutation size  $\geq 10\%$ , which are used for a broader estimation of the natural prevalence of circular permutation.

| Database               |                                         | nrPDB-90                                 | nrSCOP-90 |       |
|------------------------|-----------------------------------------|------------------------------------------|-----------|-------|
| No. of proteins        |                                         | 14422                                    | 11688     |       |
| No. of candidate pairs | 1. Detected by amino acid sequence      | 8482                                     | 2917      |       |
|                        | 2. Detected only by Ramachandran string | 313383                                   | 249153    |       |
|                        | 3. Confirmed after the refinement stage | Total                                    | 14067     | 21809 |
|                        |                                         | Symmetric CP                             | 8656      | 13896 |
|                        |                                         | Symmetric CP with sequence identity > 30 | 129       | 102   |
